# Supplementary material for: T Cell Receptor Repertoires Acquired via Routine Pap Testing May Help Refine Cervical Cancer and Precancer Risk Estimates
Source: Front Immunol. 2021 Apr 2;12:624230. doi: 10.3389/fimmu.2021.624230 (PMC8050337; doi:10.3389/fimmu.2021.624230)
Supplement: Supplementary file 2 [file Table_1.xlsx]

## Sheet: Supp. Table 1
Supplementary Table 1: Age, reference diagnosis, and HPV typing results for the full set of 103 women.
Sample ID	Age	Reference Diagnosis	HPV Type	Has Follow-up Diagnosis
1_02	38	Normal	Negative
1_05	45	Normal	70
1_06	52	Normal	Negative
1_07	53	Normal	Negative
1_08	42	Normal	Negative
1_123-1	60	Normal	CP6108
1_125-1	36	Normal	Negative
1_129	48	Normal	Negative
1_13	45	Normal	Negative
1_133	28	Normal	Negative
1_136	50	Normal	Negative
1_150-1	62	Normal	Negative
1_16	35	Normal	Negative
1_17	33	Normal	Negative
1_18	38	Normal	Negative
1_19	32	Normal	Negative
1_20	38	Normal	Negative
1_26	32	Normal	Negative
1_29	41	Normal	Negative
1_33	50	Normal	18
1_36	41	Normal	Negative
1_37	33	Normal	Negative
1_40	40	Normal	Negative
2_03	42	ASCUS/HPV-	39
2_12	37	ASCUS/HPV-	Negative
2_17	35	ASCUS/HPV-	Negative
2_18	38	ASCUS/HPV-	Negative
2_24	38	ASCUS/HPV-	70
2_27	46	ASCUS/HPV-	Negative
2_28	27	ASCUS/HPV-	51
2_30	42.5	ASCUS/HPV-	Negative	yes
2_31	51	ASCUS/HPV-	Negative	yes
2_33	27	ASCUS/HPV-	Negative
2_37	48	ASCUS/HPV-	Negative
2_42	unknown	ASCUS/HPV-	Negative
2_43	unknown	ASCUS/HPV-	Negative
2_44	unknown	ASCUS/HPV-	Negative
2_45	unknown	ASCUS/HPV-	Negative
2_46	unknown	ASCUS/HPV-	Negative
2_47	unknown	ASCUS/HPV-	Negative
3_02	30	ASCUS/HPV+	16,CP6108
3_03	37	ASCUS/HPV+	Negative
3_04	31.6	ASCUS/HPV+	Not Tested	yes
3_06	44.2	ASCUS/HPV+	18,39,53	yes
3_11	48.2	ASCUS/HPV+	33,53,59,62,69,71,81	yes
3_126	61	ASCUS/HPV+	55,81
3_127	60	ASCUS/HPV+	16
3_129-1	52	ASCUS/HPV+	31
3_133	27	ASCUS/HPV+	18,35
3_135	39	ASCUS/HPV+	56
3_19	46	ASCUS/HPV+	16,42,53,56,83
3_25	29	ASCUS/HPV+	16,59
3_26	44	ASCUS/HPV+	16
3_31	28	ASCUS/HPV+	53,55,67
3_32	29	ASCUS/HPV+	Negative	yes
3_33	26	ASCUS/HPV+	70
3_34	36	ASCUS/HPV+	16
3_35	42	ASCUS/HPV+	Negative
3_36	33	ASCUS/HPV+	31
2_3_37	45	ASCUS/HPV-	Negative
3_38	32	ASCUS/HPV+	31,33,51,62,66	yes
3_39	36	ASCUS/HPV+	26,31,58,71,83	yes
3_40	34	ASCUS/HPV+	62	yes
4_01	42.7	LSIL	53,62,70,72,CP6108	yes
4_02	33.7	LSIL	Negative	yes
4_03	27	LSIL	31
4_07	32	LSIL	39
4_11	37.2	LSIL	6,7,33	yes
4_13	27.7	LSIL	39	yes
4_147-1	34	LSIL	53,54,62
4_22	42.8	LSIL	16,42	yes
4_23	32	LSIL	33,58,72
4_31	24	LSIL	Negative
4_33	38	LSIL	39	yes
4_34	29	LSIL	53
4_35	40	LSIL	51,69
4_37	36	LSIL	18,53
4_38	37	LSIL	51,53,56,62,66,72	yes
4_39	44	LSIL	Not Tested
4_40	26	LSIL	18,56
4_41	27	LSIL	59,52
5_04	30	HSIL	Not Tested
5_06	28.7	HSIL	Not Tested	yes
5_102	37	HSIL	45,58
5_104	25	HSIL	35,61
5_107-1	28	HSIL	31
5_108	43	HSIL	Negative
5_111	27	HSIL	58
5_12	30	HSIL	16,33
5_13A	52	HSIL	6,16
5_15	42.7	HSIL	Not Tested	yes
5_19	49.2	HSIL	Not Tested	yes
5_20	49	HSIL	18
5_27	48.9	HSIL	16,62	yes
5_31	39	HSIL	16,68	yes
5_32	25	HSIL	52
5_33	36	HSIL	Not Tested	yes
5_34	32	HSIL	16		16
5_35	28	HSIL	16,53,68,73	yes
5_36	27	HSIL	16,18,62
5_37	30	HSIL	45,61,73
5_38	40	HSIL	51
5_39	34	HSIL	16,33,39,62	yes

## Sheet: Supp. Table 2
Supplementary Table 2: The log likelihood and leave-on-out cross-validation accuracy for each of 20 permuation runs.
Perumtation Run	Cost	Accuracy
1	1.491	0.46
2	2.419	0.46
3	2.187	0.75
4	2.251	0.58
5	1.578	0.5
6	0.927	0.71
7	1.674	0.63
8	0.996	0.75
9	2.396	0.5
10	2.131	0.58
11	1.724	0.83
12	1.14	0.83
13	2.645	0.58
14	1.967	0.71
15	1.513	0.79
16	2.486	0.75
17	2.247	0.46
18	1.892	0.46
19	1.431	0.58
20	1.97	0.67

## Sheet: Supp. Table 3
Supplementary Table 3: The 4-mers scoring above 0.5 for each sample when the model was trained on all 24 samples.
Sample ID	4-mer	Probability
2_30	EKET	0.947487
2_31	AGDN	0.735191
2_31	EIYG	0.925918
3_06	REPE	0.974345
3_32	QRSN	0.553118
3_32	RQET	0.879117
3_32	ERGR	0.992284
3_32	RENT	0.754334
3_38	DRGN	0.968105
3_38	RGNQ	0.532233
3_38	EDRG	0.998815
3_38	REDR	0.999975
3_39	EGFN	0.974967
3_39	EEGF	0.997301
3_39	FNTE	0.722699
3_39	FNYG	0.894018
3_39	RDNG	0.771273
3_39	EGPT	0.980075
4_01	QGDE	0.639592
4_01	EEET	0.999381
4_02	EDPG	0.995664
4_02	RDPG	0.520617
4_11	REET	0.948719
4_13	RANV	0.999936
4_13	KTYG	0.999983
4_13	LQSR	0.812965
4_13	RKTY	0.993771
4_13	RNYG	0.998415
4_13	RVPI	0.777188
4_13	MRVP	0.703384
4_13	RVDE	0.96844
4_13	IRTE	0.778312
4_13	FRYP	0.954738
4_13	RQSR	0.852728
4_13	RRVT	0.898087
4_22	YGNT	0.993892
4_33	RANV	0.98077
4_33	RLSG	0.912628
4_33	QNYG	0.729171
4_33	REGG	0.633795
4_33	EAYE	0.84764
4_33	EIPG	0.570201
5_06	GPYE	0.978347
5_06	SGPY	0.874309
5_06	HSSG	0.965664
5_15	ERDE	0.951594
5_27	DNSP	0.827729
5_27	HRDN	0.987668
5_27	RDNS	0.953103
5_27	GRET	0.637048
5_31	KRYE	0.992683
5_33	FEET	0.581196
5_33	ETGG	0.8993
5_33	EETG	0.996685
5_35	FMTG	0.998875
5_35	MTGE	0.999938
5_35	FTDT	0.995441
5_35	QDRG	0.639357
5_35	DRGR	0.963105
5_35	ERGG	0.992223

## Sheet: Supp. Table 4
Supplementary Table 4: The CDR3s containing 4-mers that scored above 0.5 for each sample when the model was trained on all 24 samples.
Sample ID	4-mer	CDR3
2_30	EKET	CASSTWEKETQYF
2_31	AGDN	CASSLDQLAGDNEQFF
2_31	AGDN	CASSLAGDNEQFF
2_31	AGDN	CSALTILAGDNEQFF
2_31	AGDN	CASTRLAGDNEQYF
2_31	EIYG	CSAREALTEIYGYTF
2_31	EIYG	CAWREIYGYTF
3_06	REPE	CSAREPEAFF
3_32	ERGR	CASERGRQETQYF
3_32	QRSN	CATSQRSNQPSI
3_32	QRSN	CATSQRSNQPQHL
3_32	QRSN	CATSQRSNQPQHF
3_32	RENT	CATSRENTGGNGYTF
3_32	RENT	CASGRENTGELFF
3_32	RENT	CASSENRDRENTEAFF
3_32	RENT	CASSARENTEAFF
3_32	RQET	CASERGRQETQYF
3_32	RQET	CASSLGTRQETQYF
3_32	RQET	CASSQEGRQETQYF
3_32	RQET	CASSPPTRQETQYF
3_38	DRGN	CSAREDRGNQPQHF
3_38	DRGN	CASRPLDRGNTGELFF
3_38	DRGN	CASSITDRGNYGYTF
3_38	DRGN	CAWGDRGNSPLHF
3_38	DRGN	CASSNRDRGNIPNQPQHF
3_38	DRGN	CSARDRDRGNQPQHF
3_38	DRGN	CASSQDRGNYGYTF
3_38	DRGN	CSAREDRGNQPQHL
3_38	DRGN	CSAREDRGNQPSI
3_38	DRGN	CASSQDRGNSPLHF
3_38	DRGN	CASSLDRGNTEAFF
3_38	EDRG	CSAREDRGNQPQHF
3_38	EDRG	CASRYREDRGETQYF
3_38	EDRG	CASSAEDRGGGEKLFF
3_38	EDRG	CSAREDRGNQPQHL
3_38	EDRG	CSAREDRGNQPSI
3_38	REDR	CSAREDRGNQPQHF
3_38	REDR	CASRYREDRGETQYF
3_38	REDR	CSAREDRGNQPQHL
3_38	REDR	CSAREDRGNQPSI
3_38	RGNQ	CSAREDRGNQPQHF
3_38	RGNQ	CASSLGQRGNQPQHF
3_38	RGNQ	CSARDRDRGNQPQHF
3_38	RGNQ	CSAREDRGNQPQHL
3_38	RGNQ	CSAREDRGNQPSI
3_38	RGNQ	CSARGNQGRDYEQYF
3_38	RGNQ	CASSYRGNQPQHF
3_38	RGNQ	CASKRGNQGNQPQHF
3_39	EEGF	CSVEEGFNTEAFF
3_39	EGFN	CSVEEGFNTEAFF
3_39	EGPT	CASSPYEGPTGELFL
3_39	EGPT	CASSPYEGPTGELFF
3_39	FNTE	CSVEEGFNTEAFF
3_39	FNYG	CSVETAFNYGYTF
3_39	RDNG	CASSPPRDNGELFL
3_39	RDNG	CASSPPRDNGELFF
4_01	EEET	CSVEEETQYF
4_01	QGDE	CASSWGQGDEQYF
4_02	EDPG	CSVEDPGVTEAFF
4_02	RDPG	CSARDPGPSSNEQFF
4_02	RDPG	CSARDPGGNTDTQYF
4_11	REET	CSGREETQYF
4_13	FRYP	CASSFFRYPQSRANVLTF
4_13	IRTE	CASSGFYLSIRTEAFF
4_13	KTYG	CASKISAGKTYGYTF
4_13	LQSR	CASSWVSLQSRANVLTF
4_13	LQSR	CASSWMSLQSRANVLTF
4_13	MRVP	CASSMRVPIRVDEQYF
4_13	RANV	CASAGATGQSRANVLTF
4_13	RANV	CASSWVSLQSRANVLTF
4_13	RANV	CASSWMSLQSRANVLTF
4_13	RANV	CASSFFRYPQSRANVLTF
4_13	RANV	YASSLSVLRQSRANVLTF
4_13	RNYG	CASSRWWECRNYGYTF
4_13	RQSR	YASSLSVLRQSRANVLTF
4_13	RVDE	CASSMRVPIRVDEQYF
4_13	RVPI	CASSMRVPIRVDEQYF
4_22	YGNT	CASSYGNTIYL
4_22	YGNT	CASTLGHDYGNTIYF
4_22	YGNT	CASSYGNTIYF
4_33	EAYE	CSARGLGGEAYEQYF
4_33	EIPG	CSAREIPGGVSGNTIYF
4_33	QNYG	CASSALLGQNYGYTF
4_33	RANV	YASSSLNRRQSRANVLTF
4_33	RANV	CASGSSCAGQSRANVLTF
4_33	RANV	CASGNIPAGQSRANVLTF
4_33	RANV	CASSTLMPQSRANVLTF
4_33	RANV	CASTFCNSQSRANVLTF
4_33	RANV	CASSWIPASQSRANVLTF
4_33	RANV	CASSHRQSRANVLTF
4_33	RANV	CASLNHLVQSRANVLTF
4_33	RANV	CSVHCRLQSRANVLTF
4_33	REGG	CASSREGGLQPQHF
4_33	RLSG	CASSQDRLSGPYEQYF
5_06	GPYE	CASSHSSGPYESTS
5_06	GPYE	CASSHSSGPYEQYF
5_06	GPYE	CASSVTSGPYEQYF
5_06	GPYE	CASHSSGPYEQYF
5_06	GPYE	CASSYSKGPYEQYF
5_06	GPYE	CTSSHSSGPYEQYF
5_06	GPYE	CASSFKAGGPYEQYF
5_06	GPYE	CANSFARGGPYEQYF
5_06	GPYE	CASSQETSGPYEQYF
5_06	GPYE	CASSLGAGGPYEQYF
5_06	GPYE	CSARFGLAGPYEQYF
5_06	GPYE	CASSFGTQGPYEQYF
5_06	GPYE	CASGDWDRGPYEQYF
5_06	HSSG	CASSHSSGPYESTS
5_06	HSSG	CASSHSSGPYEQYF
5_06	HSSG	CASHSSGPYEQYF
5_06	HSSG	CTSSHSSGPYEQYF
5_06	SGPY	CASSHSSGPYESTS
5_06	SGPY	CASSHSSGPYEQYF
5_06	SGPY	CASSVTSGPYEQYF
5_06	SGPY	CASHSSGPYEQYF
5_06	SGPY	CASSFRDSGPYGYTF
5_06	SGPY	CTSSHSSGPYEQYF
5_06	SGPY	CASSQETSGPYEQYF
5_15	ERDE	CASSLRGERDEQFF
5_15	ERDE	CSARIERDEQYF
5_27	DNSP	CASSSIQGDNSPLHF
5_27	DNSP	CASHRDNSPLHF
5_27	GRET	CSAHPPGQGRETQYF
5_27	GRET	CASTPDSTGRETQYF
5_27	GRET	CATSGTDGRETEAFF
5_27	HRDN	CASHRDNSPLHF
5_27	RDNS	CASHRDNSPLHF
5_31	KRYE	CASRKRYEQYF
5_33	EETG	CASSFEETGGYTF
5_33	ETGG	CASSFEETGGYTF
5_33	FEET	CASSFEETGGYTF
5_33	FEET	CATSTRTGQFEETQYF
5_35	DRGR	CASSQDRGRAFF
5_35	DRGR	CATSAPDRGRGGELFF
5_35	DRGR	CASKDRGRGTQYF
5_35	ERGG	CASAERGGQETQYF
5_35	FMTG	CASSFMTGEQYF
5_35	FMTG	CASSFMTGGQYF
5_35	FTDT	CASSPGAGSFTDTQYF
5_35	FTDT	CASRYRDTFTDTQYF
5_35	FTDT	CASSPGAGSFTDTQYL
5_35	FTDT	CAISGGRGFTDTQYF
5_35	FTDT	CSARDWAGAFTDTQYF
5_35	FTDT	CASSGDRGPFTDTQYF
5_35	MTGE	CASSFMTGEQYF
5_35	QDRG	CASSQDRGRAFF
5_35	QDRG	CAGSQDRGQATNEKLFF
5_35	QDRG	CASSQDRGQATNEKLFF
5_35	QDRG	CASSYVQDRGNYGYTF
5_35	QDRG	CASSQDRGGQGTDTQYF
5_35	QDRG	CASSQDRGEKLFF
5_35	QDRG	CASTQDRGETQYF
5_35	QDRG	CASSQDRGFSYEQYF

## Sheet: Supp. Table 5
Supplementary Table 5: The highest-scoring 4-mer and the most abundant CDR3 in which it appears for each sample when the model was trained on all 24 samples. The CDR3s relative abundance rank is also shown, where the most abundant clone in each sample received a rank of 1.
Sample ID	4-mer	CDR3	Relative Abundance Rank
2_30	EKET	CASSTWEKETQYF	9
2_31	EIYG	CAWREIYGYTF	7
3_06	REPE	CSAREPEAFF	15
3_32	ERGR	CASERGRQETQYF	3
3_38	REDR	CSAREDRGNQPQHF	1
3_39	EEGF	CSVEEGFNTEAFF	1
4_01	EEET	CSVEEETQYF	25
4_02	EDPG	CSVEDPGVTEAFF	3
4_11	REET	CSGREETQYF	16
4_13	KTYG	CASKISAGKTYGYTF	1
4_22	YGNT	CASSYGNTIYF	1
4_33	RANV	YASSSLNRRQSRANVLTF	8
4_33	RANV	CASGSSCAGQSRANVLTF	8
4_33	RANV	CASGNIPAGQSRANVLTF	8
4_33	RANV	CASSTLMPQSRANVLTF	8
4_33	RANV	CASTFCNSQSRANVLTF	8
4_33	RANV	CASSWIPASQSRANVLTF	8
4_33	RANV	CASSHRQSRANVLTF	8
4_33	RANV	CASLNHLVQSRANVLTF	8
4_33	RANV	CSVHCRLQSRANVLTF	8
5_06	GPYE	CASSHSSGPYEQYF	1
5_15	ERDE	CSARIERDEQYF	13
5_27	HRDN	CASHRDNSPLHF	2
5_31	KRYE	CASRKRYEQYF	2
5_33	EETG	CASSFEETGGYTF	1
5_35	MTGE	CASSFMTGEQYF	1

## Sheet: Supp. Table 6
Supplementary Table 6: Cervical cancer screening-related procedures and diagnoses after each patient's index sample, the one on which we conducted TCRB sequencing.
Sample ID	Cervical Procedures and Diagnoses following the Index Sample
2_30	Pap normal (NILM)/HPV- 710 days later
2_31	Pap normal (NILM) 376 days later
3_06	Cervical biopsy with LSIL 55 days later; Pap normal (NILM)/HPV+ 428 days later; Pap normal (NILM)/HPV- 939 days later
3_32	ECC negative 51 days later; Pap normal (NILM)/HPV- 417 days later
3_38	Cervical biopsy and ECC negative 42 days later; Pap normal (NILM)/HPV+ 404 days later
3_39	Cervical biopsy with LSIL and ECC negative 88 days later; Pap normal (NILM)/HPV+ 461 days later; LEEP negaitve 522 days later; Pap normal (NILM) 872 days later
4_01	ECC negative 78 days later; Pap normal (NILM)/HPV- 495 days later
4_02	Cervical biopsy with LSIL and ECC negative 235 days later; Pap normal (NILM)/HPV+ 711 days later
4_11	ECC negative 49 days later; Pap normal (NILM)/HPV- 511 days later
4_13	ECC negative 345 days later; Pap normal (NILM) 710 days later
4_22	ECC negative 45 days later; Pap normal (NILM)/HPV- 423 days later
4_33	Cervical biopsy with LSIL and ECC with LSIL 53 days later; Pap normal (NILM)/HPV- 419 days later
5_06	Cervical biopsy with HSIL/CIN2-3 41 days later; LEEP negative 89 days later; ECC negative 236 days later; Pap normal (NILM)/HPV- 420 days later; Pap normal (NILM)/HPV- 783 days later
5_15	ECC negative 48 days later; LEEP with HSIL/CIN3 and ECC negaitve 84 days later; Pap normal (NILM)/HPV- 457 days later
5_27	Cervical biopsy with HSIL/CIN3 and ECC with HSIL/CIN3 45 days later; LEEP with SCC and AIS 96 days later; Pap normal (NILM) 655 days later; Pap normal (NILM) 1141 days later
5_31	Cervical biopsy with LSIL and ECC negative 52 days later; Pap with ASCUS/HPV- 488 days later; Pap normal (NILM)/HPV- 908 days later
5_33	Cervical biopsy with HSIL/CIN2 63 days later; Pap normal (NILM) 479 days later
5_35	Cervical biopsy and ECC with HSIL/CIN3 52 days later; LEEP with HSIL/CIN3 125 days later; ECC insufficient for diagnosis 266 days later; Pap with ASCUS/HPV+ 280 days later; ECC negative 357 days later; Pap normal (NILM)/HPV- 637 days later
3_04	Cervical biopsy with LSIL and ECC with LSIL 53 days later; Pap with LSIL/HPV+ 486 days later; cervical biopsy negative and ECC negative 567 days later; Pap with ASCUS/HPV+ 949 days later; cervical biopsy with LSIL 1054 days later
3_11	ECC with LSIL 61 days later; Pap with LSIL/HPV+ 502 days later; ECC negative 680 days later
3_40	Cervical biopsy with LSIL and ECC negative 13 days later; Pap with LSIL/HPV- 484 days later
4_38	Cervical biopsy with LSIL 46 days later; Pap with LSIL/HPV+ 516 days later
5_19	Pap with HSIL 574 days later; Cervical biopsy negative 604 days later
5_39	Pap with HSIL 365 days later; cervical biopsy with HSIL/CIN3 418 days later
	NILM: Negaitve for intraepithelial lesion or malignancy
	ECC: Endocervical curettage
	LEEP: Loop electrosurgical excision procedure
	SCC: Squamous cell carcinoma
	AIS: Adenocarcinoma in situ
	CIN: Cervical intraepithelial neoplasia
	LSIL: Low-grade squamous intraepithelial lesion
	HSIL: High-grade squamous intraepithelial lesion
